# Supplementary material for: Anthropometric Parameters and Mediterranean Diet Adherence in Preschool Children in Split-Dalmatia County, Croatia—Are They Related?
Source: MDPI journal article supplement (doi:10.3390/nu13124252), 2021-11-26
Supplement: s1 [file s1]

Table S1. An example of a menu from kindergartens.

| <b>Full day kindergarten programme menu</b>              |                                                            |                               |                                                                                               |                                         |
|----------------------------------------------------------|------------------------------------------------------------|-------------------------------|-----------------------------------------------------------------------------------------------|-----------------------------------------|
|                                                          | <b>Breakfast</b>                                           | <b>Morning snack</b>          | <b>Lunch</b>                                                                                  | <b>Afternoon snack</b>                  |
| <b>Monday</b>                                            | milk, chocolate hazelnut spread on a white bread           | apple or other seasonal fruit | beef and potato stew, lettuce, bread; muffin                                                  | chocolate pudding                       |
| <b>Tuesday</b>                                           | cocoa, butter and rose-hip jam on a white bread            | tangerine/orange              | pumpkin soup, roast chicken breasts with cooked cabbage and potatoes (olive oil), white bread | probiotic yogurt                        |
| <b>Wednesday</b>                                         | milk, gouda cheese with butter on white bread              | pear or other seasonal fruit  | lentil stew with meatballs, white bread                                                       | berry fruit tea with lemon and honey    |
| <b>Thursday</b>                                          | : fruit tea, cheese spread (30% milk fat) on a white bread | apple or other seasonal fruit | soup with millet, turkey in sauce with polenta, beetroot salad, bread; marble cake            | milk, cornflakes                        |
| <b>Friday</b>                                            | chocolate milk, butter with honey on a whole grain bread   | banana                        | fried sardines with cooked chard and potatoes (olive oil), whole grain bread                  | semolina cooked with milk and chocolate |
| <b>- Five-hour and six-hour kindergarten programme –</b> |                                                            |                               |                                                                                               |                                         |
|                                                          | <b>First snack</b>                                         |                               | <b>Second snack</b>                                                                           |                                         |
| <b>Monday :</b>                                          | : milk, chocolate hazelnut spread on a white bread         |                               | apple or other seasonal fruit                                                                 |                                         |
| <b>Tuesday</b>                                           | cocoa, butter and rose-hip jam on a white bread            |                               | tangerine/orange                                                                              |                                         |
| <b>Wednesday</b>                                         | milk, gouda cheese with butter on a white bread            |                               | pear or other seasonal fruit                                                                  |                                         |
| <b>Thursday</b>                                          | : fruit tea, cheese spread (30% milk fat) on a white bread |                               | apple or other seasonal fruit                                                                 |                                         |
| <b>Friday</b>                                            | chocolate milk, butter and honey on a whole grain bread    |                               | banana                                                                                        |                                         |
